# Supplementary material
Source: PubMed Central journal article supplement (PMC2701882)
Supplement: JCI38922sd.pdf [file JCI38922sd.pdf]

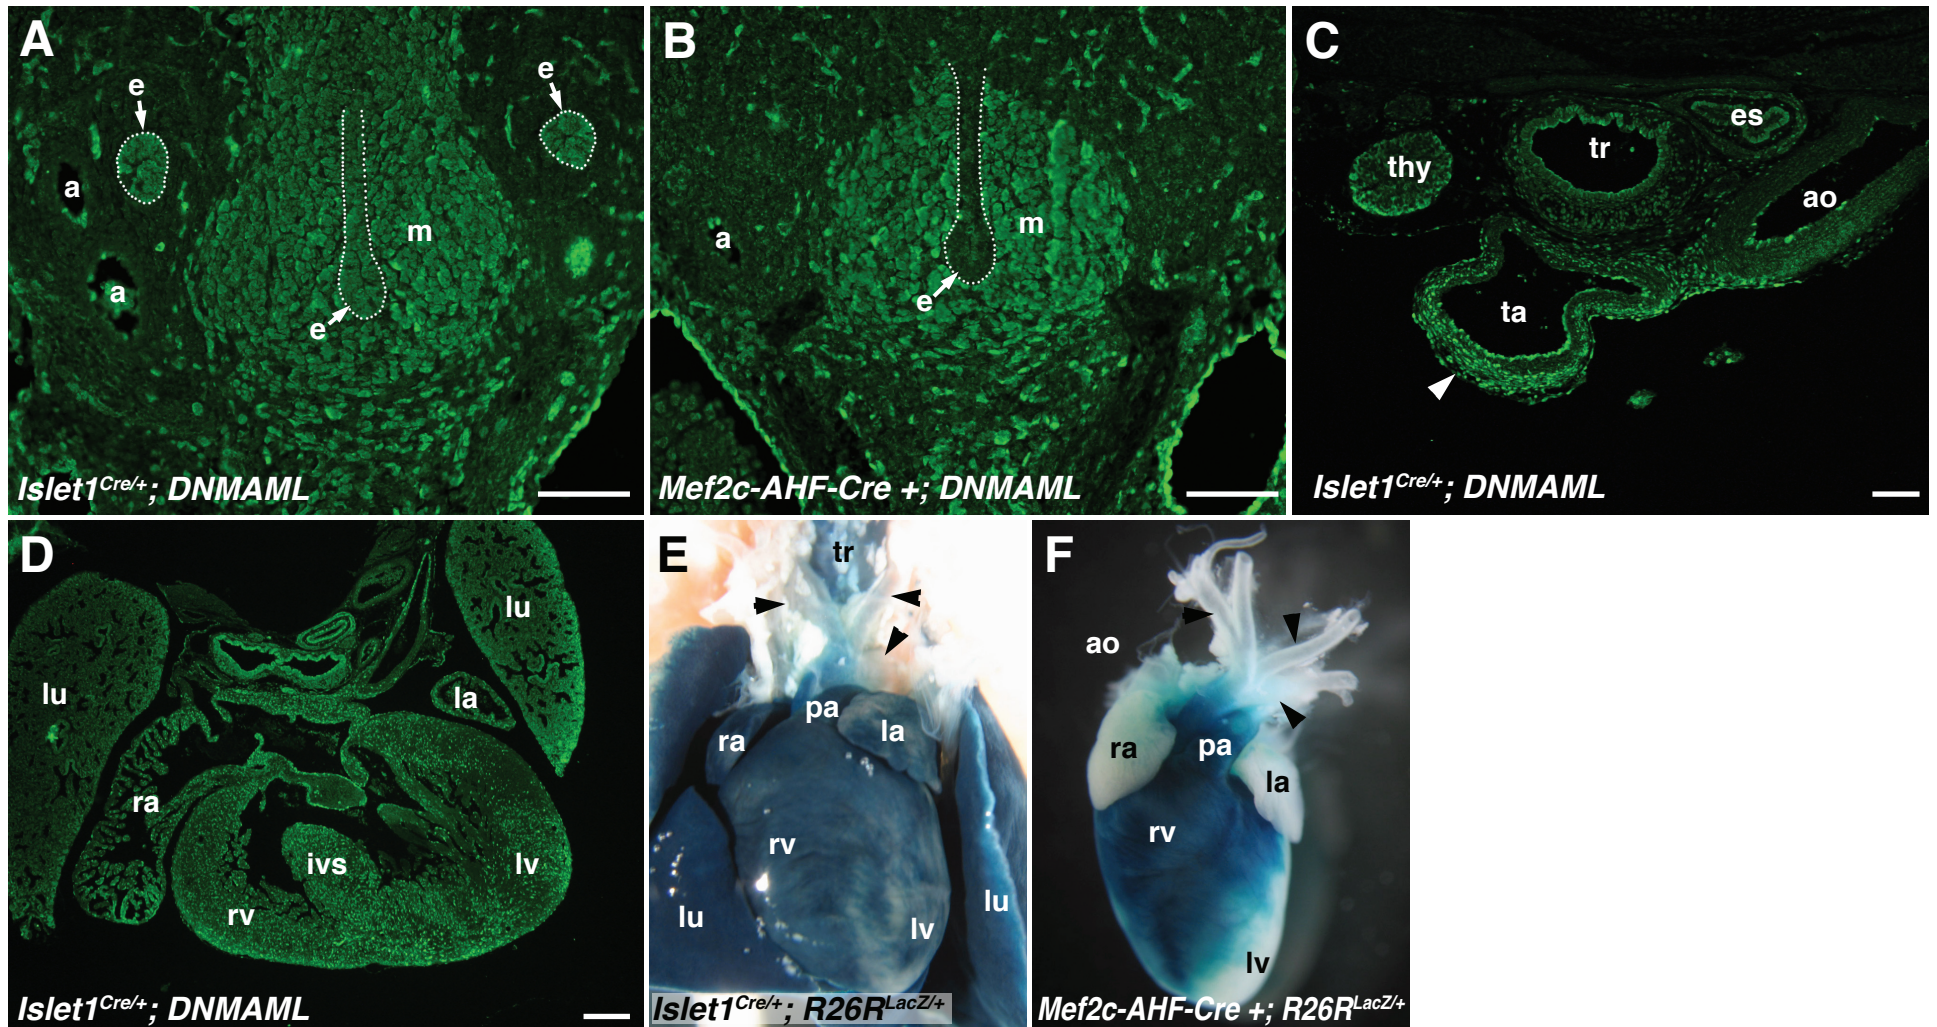

**Supplementary Figure 1: Fate mapping of *Islet1Cre* and *Mef2c-AHF-Cre* derivatives.** (A-D) Immunostaining for GFP to reveal DNMA1L-GFP expression in mutant embryos. (A and B) Comparable frontal sections through E12.5 *Islet1Cre/+; DNMA1L* (A) and *Mef2c-AHF-Cre +; DNMA1L* (B) embryos. Note that both Cre lines result in DNMA1L-GFP expression in the pharyngeal mesenchyme, while only *Islet1Cre/+; DNMA1L* embryos show DNMA1L-GFP expression in the pharyngeal endoderm. (C) Section through the aortic arch of an E17.5 *Islet1Cre/+; DNMA1L* embryo, showing DNMA1L-GFP expression in the second heart field-derived cells at the base of the truncus arteriosus (ta, arrowhead), while there is no significant contribution of DNMA1L-GFP positive cells to the aortic arch (ao). Note also DNMA1L-GFP expression in endoderm-derived tissues, including the esophagus and trachea. (D) Section through the heart of an E17.5 *Islet1Cre/+; DNMA1L* mutant, showing broad distribution of DNMA1L-GFP positive cells throughout the heart, including the right ventricle (rv), inter-ventricular septum (ivs), the majority of the left ventricle (lv), and regions of the right and left atria (ra, la). (E and F) Postnatal hearts from *Islet1Cre/+; R26RLacZ/+* (E) and *Mef2c-AHF-Cre +; R26RLacZ/+* (F) mice. Note that *Islet1Cre* results in Cre-mediated recombination throughout most of the heart, as well as the lungs and trachea. In contrast, *Mef2c-AHF-Cre* results in more restricted recombination in the right ventricle and OFT. Neither *Islet1Cre* nor *Mef2c-AHF-Cre* results in significant recombination in the aortic arch or its branches (arrowheads in E and F). Scale bars: 100 $\mu$ m (A-C), 250 $\mu$ m (D). Magnification: 30X (E) and 15X (F). Abbreviations: m: mesenchyme, e: pharyngeal endoderm, es: esophagus, tr: trachea, lu: lung, pa: pulmonary artery.

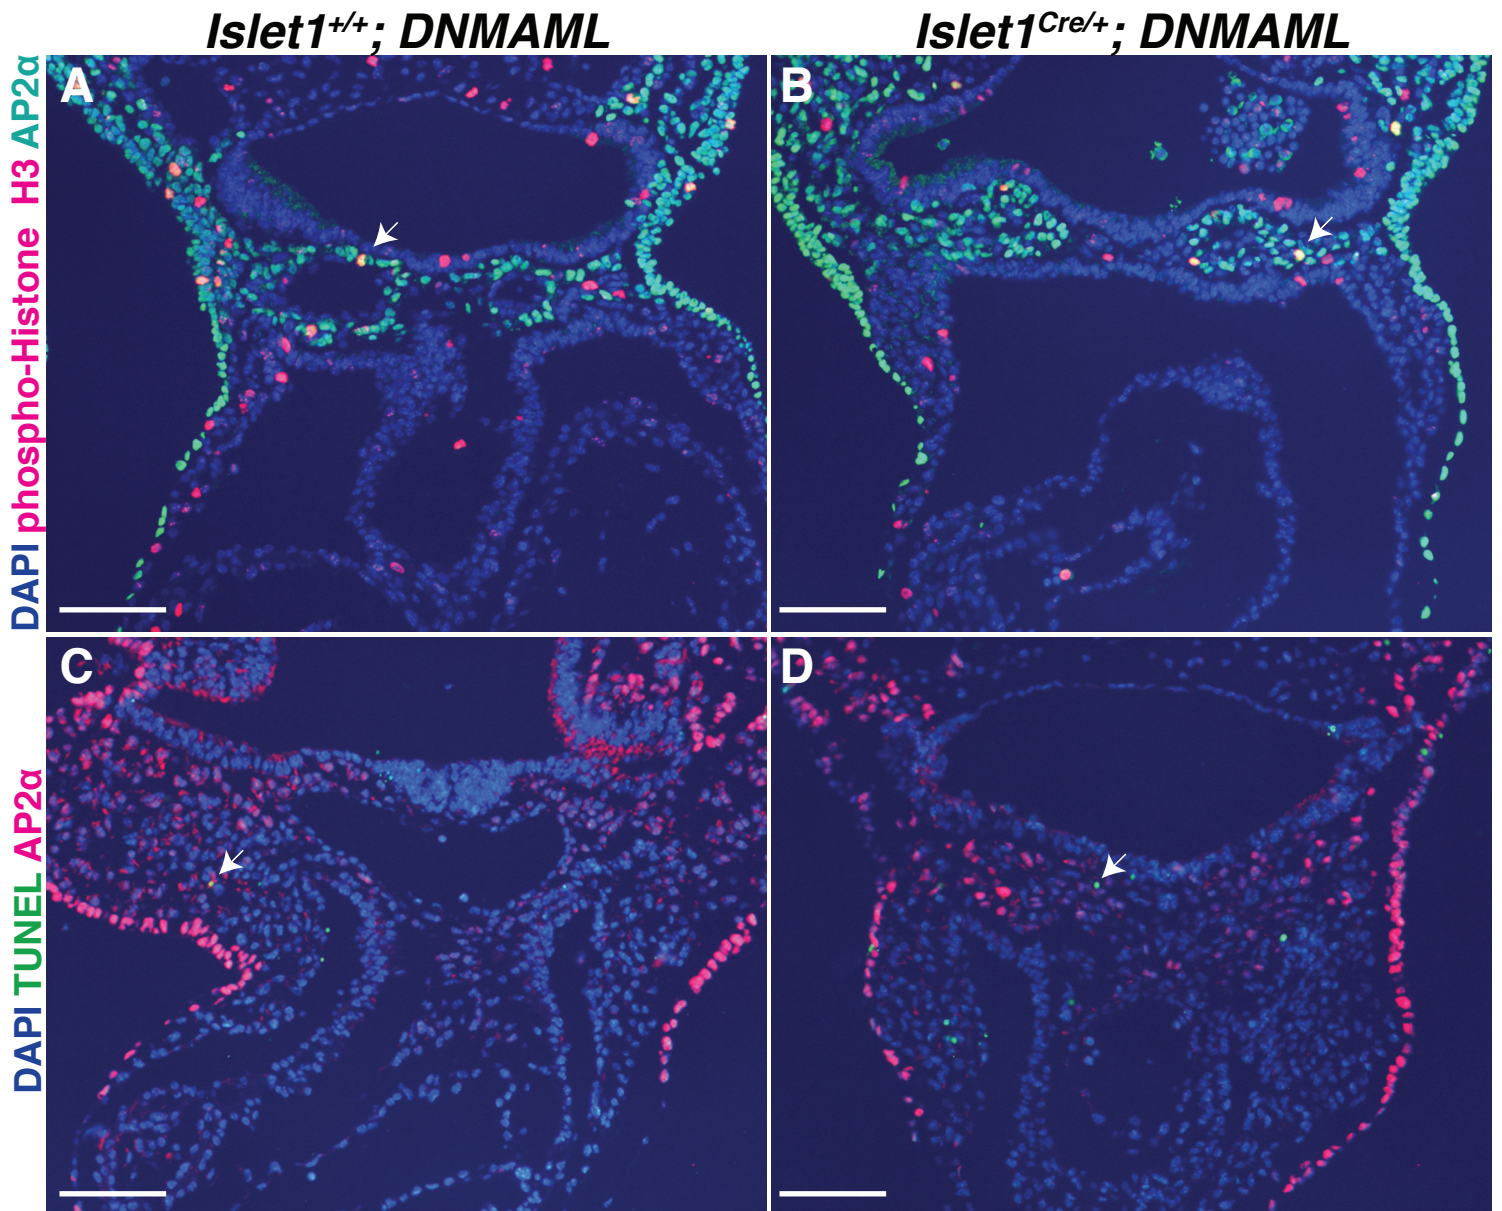

**Supplementary Figure 2: Analysis of proliferation and apoptosis of neural crest.**

A, B - Costaining of Phospho-histone H3 (to show proliferation) and AP2α (a marker of neural crest and ectoderm) at E9.5. C,D - Costaining for TUNEL (to show apoptosis) and AP2α at E10. Arrows indicate co-stained cells. As discussed in the results section, no statistically significance was seen in the percentage of p-Histone3 positive or TUNEL positive neural crest cells between *Islet1*<sup>+/+</sup>; DNMAML and *Islet1*<sup>Cre/+</sup>; DNMAML in the ventral pharynx after analysis of serial sections of multiple litters. Scale bars: 100μm.

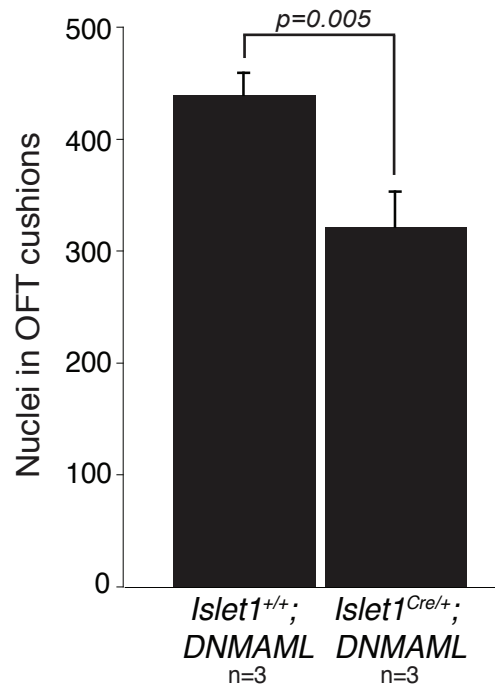

**Supplementary Figure 2: Quantification of *Islet1*<sup>Cre/+</sup>; DNMAML outflow tract cushion cells.** Nuclei were counted in outflow tract cushions, both mutant and control, from 3 different E10.5 litters. There was a statistically significant difference in number of nuclei,  $p=0.005$ . Error bars represent one standard deviation.

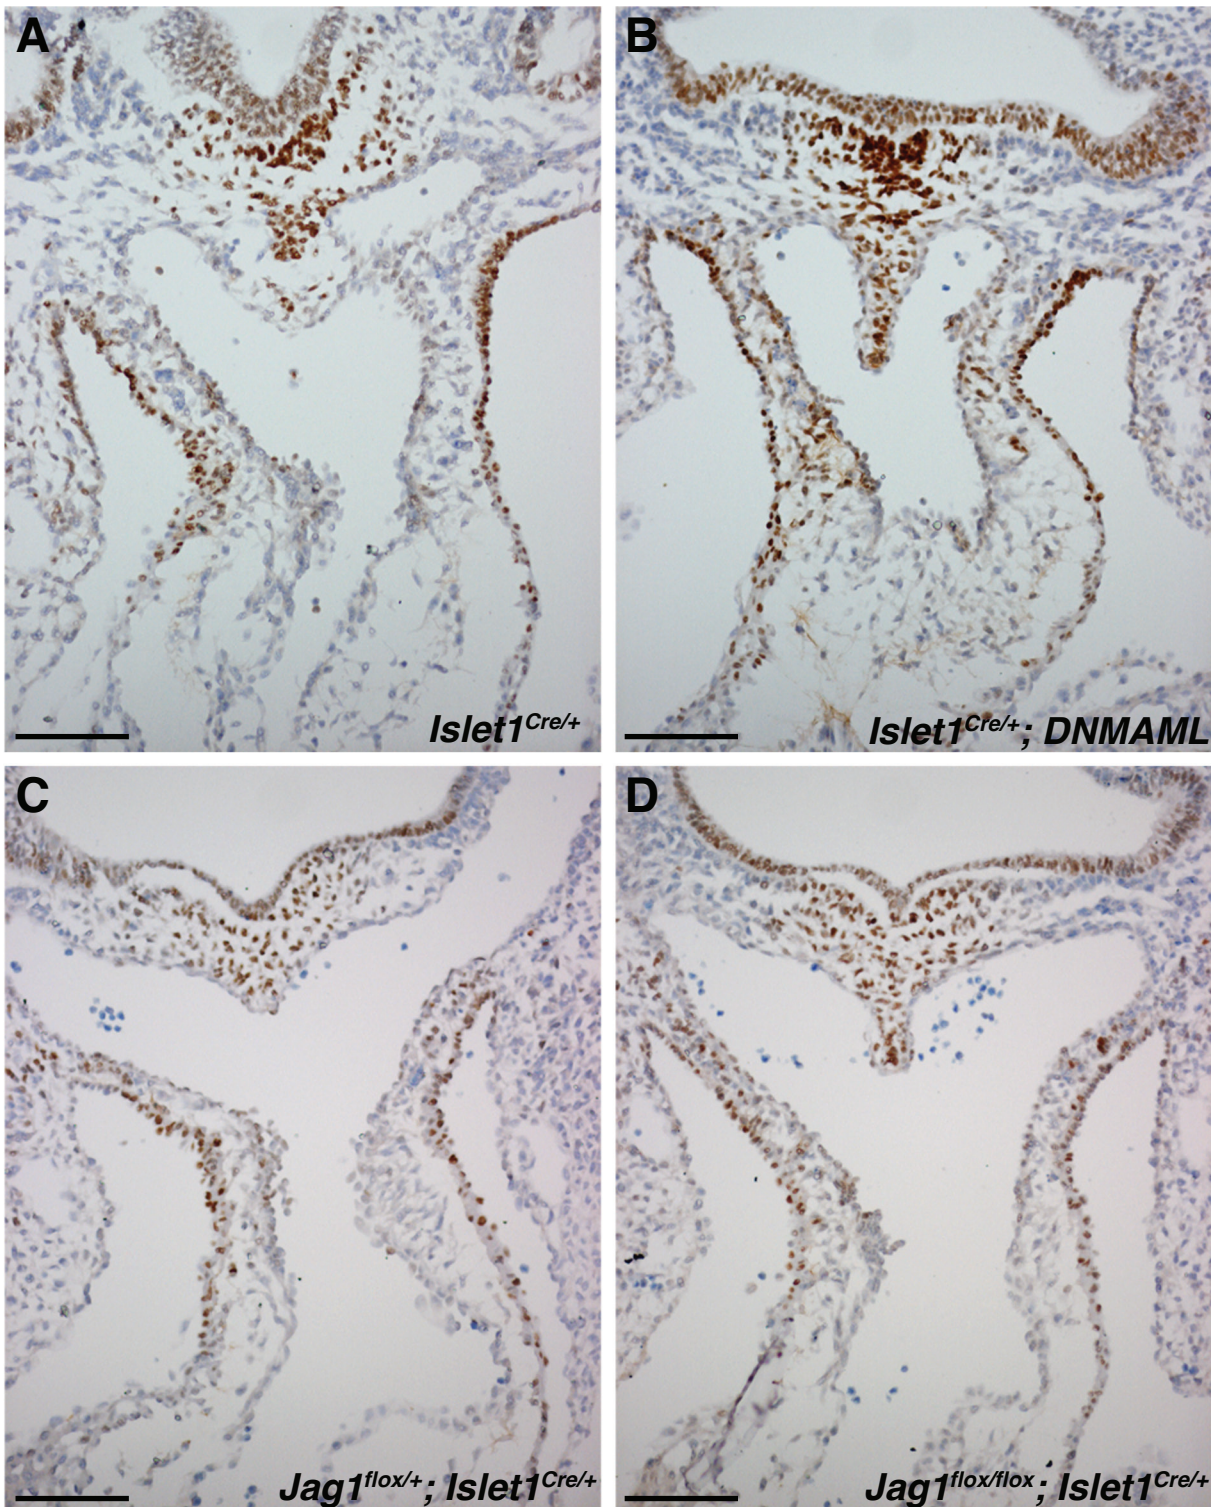

**Supplementary Figure 4: Islet1 Immunohistochemistry**  
(A and B) Representative cross sections of Islet1 IHC of *Islet1<sup>Cre/+</sup>* (A) and *Islet1<sup>Cre/+</sup>; DNMA1L* (B) embryos (E10.5). (C and D) Representative cross sections of *Jag1<sup>flox/+</sup>; Islet1<sup>Cre/+</sup>* (C) and *Jag1<sup>flox/flox</sup>; Islet1<sup>Cre/+</sup>* (D) littermates (E10). Quantitation of serial sections did not reveal a statistically significant difference in number of Islet1+ cells (see Results). Scale bars: 100µm.

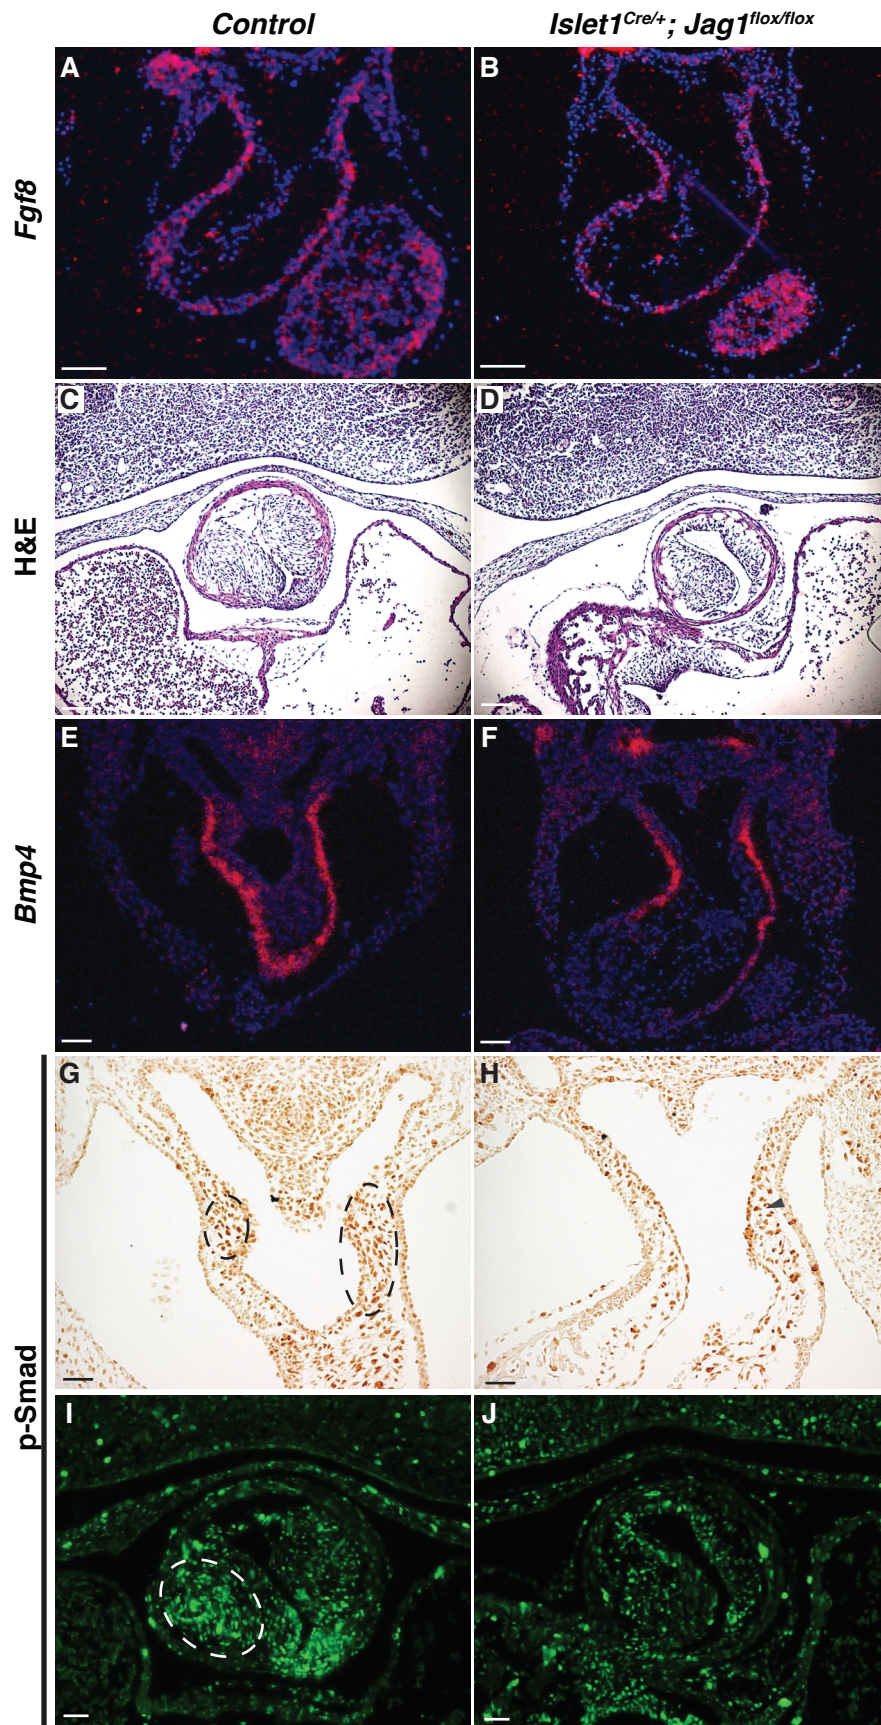

**Supplementary Figure 5: Cardiovascular defects and diminished *Fgf8* expression and *Bmp4* signaling in *Islet1<sup>Cre+</sup>; Jag1<sup>flox/flox</sup>* mutants.** (A and B) In situ hybridizations for *Fgf8* on transverse sections of E9.5 control (A) and mutant (B) embryos. (C and D) Coronal H&E sections of E10.5 littermate embryos demonstrate normal OFT cushion cellularity in control embryos (C), but hypocellularity in the mutant OFT cushions (D). (E and F) In situ hybridization for *Bmp4* using transverse sections of control (E) and mutant (F) E10.5 embryos. (G-J) Phospho-Smad immunohistochemistry of E10.5 embryos of control (G and I) and mutants (H and J). Phospho-Smad positive cells are indicated by the dotted circle in I. Scale bars: 100  $\mu$ m.

Supplementary Table 1: Genotyping Data

| <b>Cross</b>                                                                                           | <b>Genotype</b>                                                    | <b>E9.5-<br/>E14.5</b> | <b>E17.5-<br/>E18.5</b> | <b>P0</b>      | <b>P1-<br/>P7</b> |
|--------------------------------------------------------------------------------------------------------|--------------------------------------------------------------------|------------------------|-------------------------|----------------|-------------------|
| <i>Islet1</i> <sup>Cre/+</sup> x<br><i>R26R</i> <sup>DNMAML/DNMAML</sup>                               | <i>R26R</i> <sup>DNMAML/+</sup>                                    | 127                    | 11                      | 3              | 18                |
|                                                                                                        | <i>Islet1</i> <sup>Cre/+</sup> ; <i>R26R</i> <sup>DNMAML/+</sup>   | 119                    | 10                      | 3*             | 0 <sup>1</sup>    |
| <i>Mef2c-AHF-Cre</i> + x<br><i>R26R</i> <sup>DNMAML/DNMAML</sup>                                       | <i>R26R</i> <sup>DNMAML/+</sup>                                    | 20                     | -                       | 6              | 14                |
|                                                                                                        | <i>Mef2c-AHF-Cre</i> +;<br><i>R26R</i> <sup>DNMAML/+</sup>         | 16                     | -                       | 9*             | 0 <sup>2</sup>    |
| <i>Islet1</i> <sup>Cre/+</sup> ; <i>Jag1</i> <sup>fllox/+</sup> x<br><i>Jag1</i> <sup>fllox/flox</sup> | <i>Jag1</i> <sup>fllox/+</sup>                                     | 33                     | 21                      | 4              | -                 |
|                                                                                                        | <i>Jag1</i> <sup>fllox/flox</sup>                                  | 40                     | 24                      | 8              | -                 |
|                                                                                                        | <i>Islet1</i> <sup>Cre/+</sup> ; <i>Jag1</i> <sup>fllox/+</sup>    | 28                     | 25                      | 9              | -                 |
|                                                                                                        | <i>Islet1</i> <sup>Cre/+</sup> ; <i>Jag1</i> <sup>fllox/flox</sup> | 23                     | 8                       | 0 <sup>3</sup> | -                 |
| <i>Mef2c-AHF-Cre</i> +;<br><i>Jag1</i> <sup>fllox/+</sup> x <i>Jag1</i> <sup>fllox/flox</sup>          | <i>Jag1</i> <sup>fllox/+</sup>                                     | 2                      | 2                       | 13             | -                 |
|                                                                                                        | <i>Jag1</i> <sup>fllox/flox</sup>                                  | 2                      | 6                       | 7              | -                 |
|                                                                                                        | <i>Mef2c-AHF-Cre</i> +; <i>Jag1</i> <sup>fllox/+</sup>             | 3                      | 1                       | 15             | -                 |
|                                                                                                        | <i>Mef2c-AHF-Cre</i> +; <i>Jag1</i> <sup>fllox/flox</sup>          | 1                      | 2                       | 7*             | -                 |

<sup>1</sup>p<0.0001; <sup>2</sup>p=0.0002; <sup>3</sup>p=0.01

\* At P0 all mutants were dead or cyanotic
